# Supplementary material
Source: bioRxiv or medRxiv preprint supplement (https://medrxiv.org/highwire/filestream/78898/field_highwire_adjunct_files/3/2020.04.28.20083246-4.pdf)
Supplement: Supplementary file [file 2020.04.28.20083246-4.pdf]

**Table S4. Critical illness and death in cancer patients.**

| Cancer history                 | Total      |                      | With recent anti-tumor treatment |                      |              |                      |            |                      |            |                      | Without recent anti-tumor treatment |                      |
|--------------------------------|------------|----------------------|----------------------------------|----------------------|--------------|----------------------|------------|----------------------|------------|----------------------|-------------------------------------|----------------------|
|                                | Dead/total | Critically ill/total | All patients                     |                      | Chemotherapy |                      | Surgery    |                      | Others     |                      | Dead/total                          | Critically ill/total |
|                                |            |                      | Dead/total                       | Critically ill/total | Dead/total   | Critically ill/total | Dead/total | Critically ill/total | Dead/total | Critically ill/total |                                     |                      |
| <b>Former cancer patients</b>  | 7/76       | 12/76                | NA                               | NA                   | NA           | NA                   | NA         | NA                   | NA         | NA                   | 7/76                                | 12/76                |
| <b>Current cancer patients</b> | 43/207     | 51/207               | 26/95                            | 28/95                | 15/46        | 17/46                | 6/23       | 6/23                 | 5/26       | 8/26                 | 17/102                              | 23/102               |
| Breast cancer                  | 2/21       | 3/21                 | 0/8                              | 0/8                  | 0/3          | 0/3                  | 0/0        | 0/0                  | 0/5        | 0/5                  | 2/13                                | 3/13                 |
| Cervical cancer                | 0/6        | 1/6                  | 0/4                              | 1/4                  | 0/3          | 1/3                  | 0/1        | 0/1                  | 0/0        | 0/0                  | 0/2                                 | 0/2                  |
| Colorectal cancer              | 0/20       | 0/20                 | 0/7                              | 0/7                  | 0/4          | 0/4                  | 0/3        | 0/3                  | 0/0        | 0/0                  | 0/13                                | 0/13                 |
| Esophageal cancer              | 3/9        | 4/9                  | 1/6                              | 1/6                  | 0/0          | 0/0                  | 0/3        | 0/3                  | 1/3        | 2/3                  | 2/3                                 | 3/3                  |
| Gastric cancer                 | 4/13       | 4/13                 | 3/6                              | 3/6                  | 1/3          | 1/3                  | 2/3        | 2/3                  | 0/0        | 0/0                  | 1/7                                 | 1/7                  |
| Hepatocellular carcinoma       | 2/8        | 2/8                  | 2/6                              | 2/6                  | 0/2          | 0/2                  | 0/1        | 0/1                  | 2/3        | 2/3                  | 0/2                                 | 0/2                  |
| Leukemia                       | 5/9        | 5/9                  | 3/5                              | 3/5                  | 3/3          | 3/3                  | 0/0        | 0/0                  | 0/2        | 0/2                  | 2/4                                 | 2/4                  |
| Lung cancer                    | 13/46      | 15/46                | 8/25                             | 9/25                 | 5/11         | 6/11                 | 2/8        | 2/8                  | 1/6        | 3/6                  | 5/21                                | 6/21                 |
| Lymphoma                       | 4/8        | 5/8                  | 4/5                              | 4/5                  | 4/4          | 4/4                  | 0/0        | 0/0                  | 0/1        | 0/1                  | 0/3                                 | 1/3                  |
| Thyroid carcinoma              | 0/16       | 1/16                 | 0/0                              | 0/0                  | 0/0          | 0/0                  | 0/0        | 0/0                  | 0/0        | 0/0                  | 0/16                                | 1/16                 |
| Urothelial cancer              | 1/7        | 1/7                  | 0/3                              | 0/3                  | 0/2          | 0/2                  | 0/0        | 0/0                  | 0/1        | 0/1                  | 1/4                                 | 1/4                  |
| Others                         | 9/44       | 10/44                | 5/20                             | 5/20                 | 2/11         | 2/11                 | 2/4        | 2/4                  | 1/5        | 1/5                  | 4/24                                | 5/24                 |

Data are n/N. NA=not applicable.
